# Supplementary material
Source: publisher figshare collection journal article supplement (https://acs.figshare.com/ndownloader/files/5718585)

Supporting material

**Fig 2.** van't Hoff plot of  $-\ln K_i$  vs  $1/T$  for 5 inhibitors binding to almond  $\beta$ -glucosidase. The  $K_i$  values were determined at pH 6.8 in 0.05 M phosphate buffer. 4-Nitrophenyl  $\beta$ -D-glucoside was used as substrate.

Figure 2

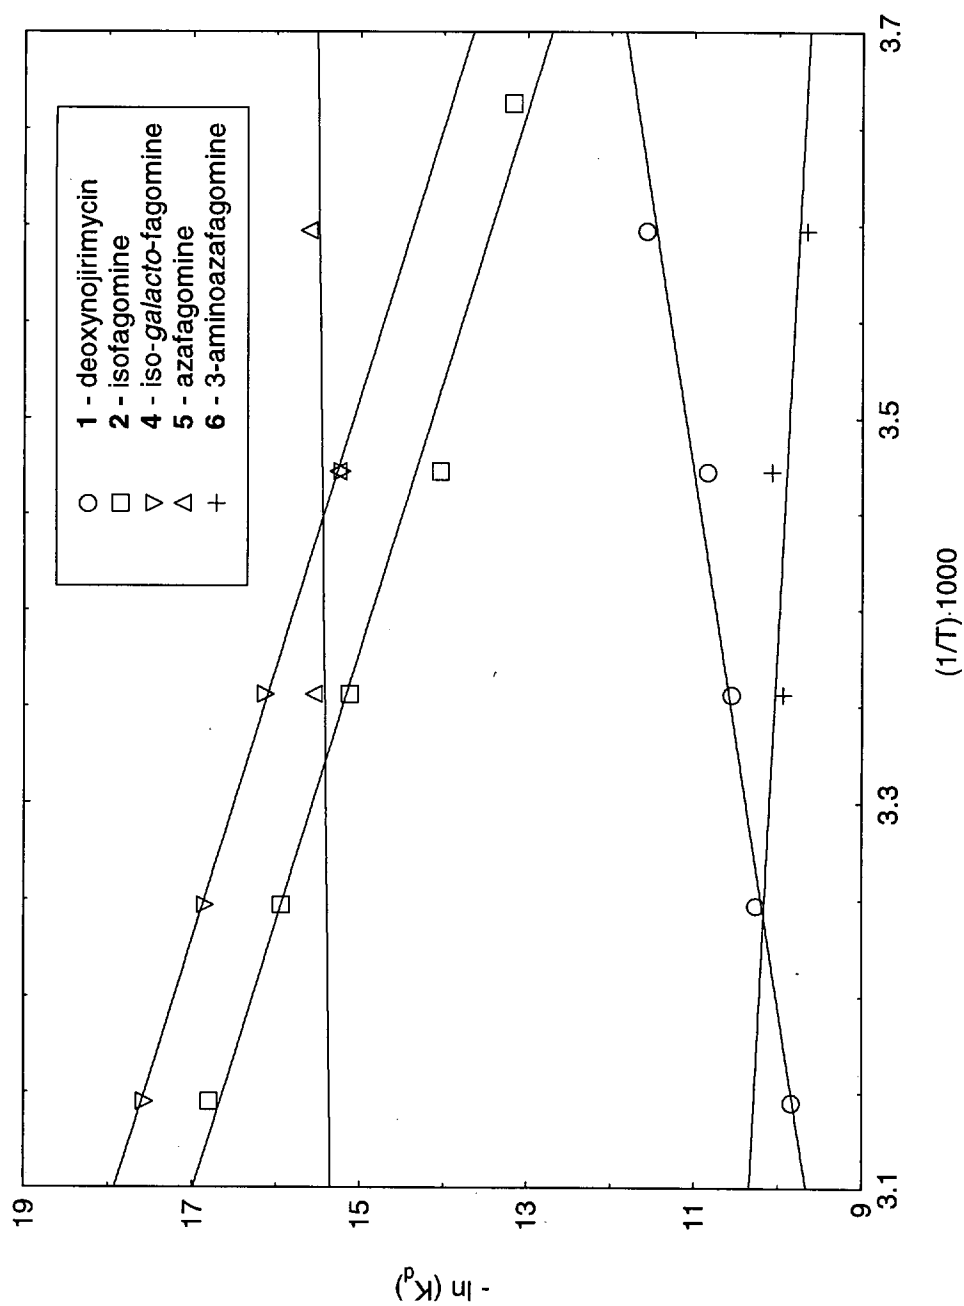

Supplement: Supplementary file 1 [file 5718585]
